# Supplementary material for: A highly sensitive non-enzymatic hydrogen peroxide and hydrazine electrochemical sensor based on 3D micro-snowflake architectures of α-Fe2O3
Source: Royal Society of Chemistry journal article supplement (doi:10.1039/c6ra10470c), 2016-01-01
Supplement: c6ra10470c1.pdf [file c6ra10470c1.pdf]

# A high sensitive non-enzymatic hydrogen peroxide and hydrazine electrochemical sensor based on 3D micro-snowflakes architectures of $\alpha\text{-Fe}_2\text{O}_3$

S.Majumder<sup>#a,b\*</sup>, B.Saha<sup>#a</sup>, S.Dey<sup>b</sup>, R.Mondal<sup>b</sup>, S. Kumar<sup>b</sup> and S. Banerjee<sup>a\*</sup>

<sup>a</sup>Saha Institute of Nuclear Physics, 1/AF Bidhannagar, Kolkata – 700064, India

<sup>b</sup>Department of Physics, Jadavpur University, Kolkata – 700032, India

\*Corresponding Authors Email-kumars@phys.jdvu.ac.in,  
[sangam.banerjee@saha.ac.in](mailto:sangam.banerjee@saha.ac.in)

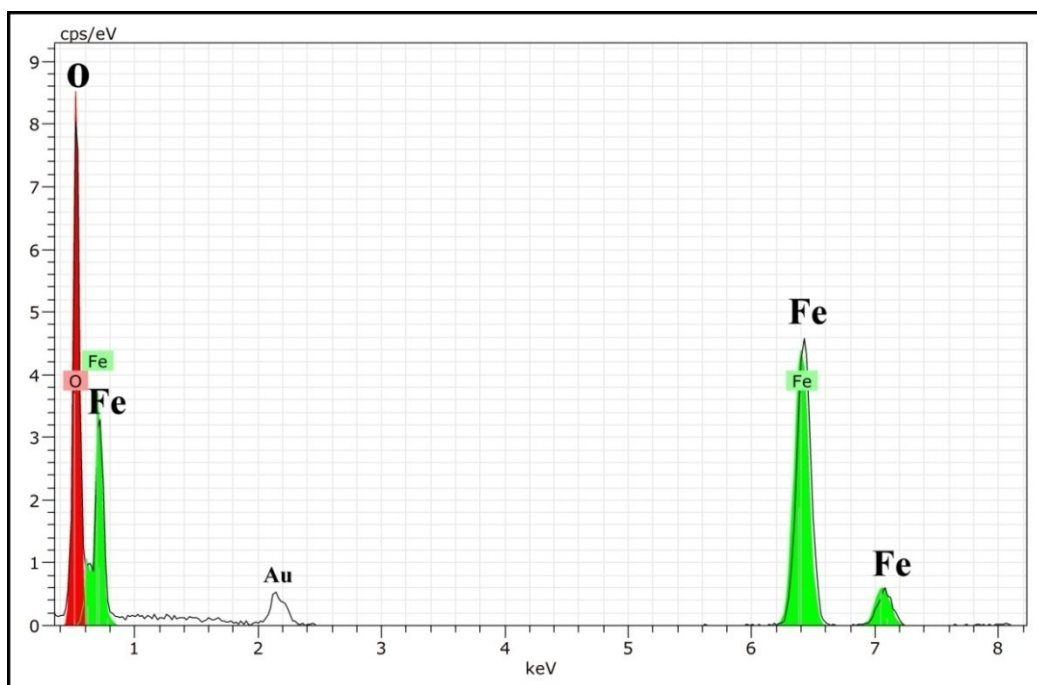

**Fig. S1** EDS spectra of the micro-snowflake structured  $\alpha\text{-Fe}_2\text{O}_3$ .

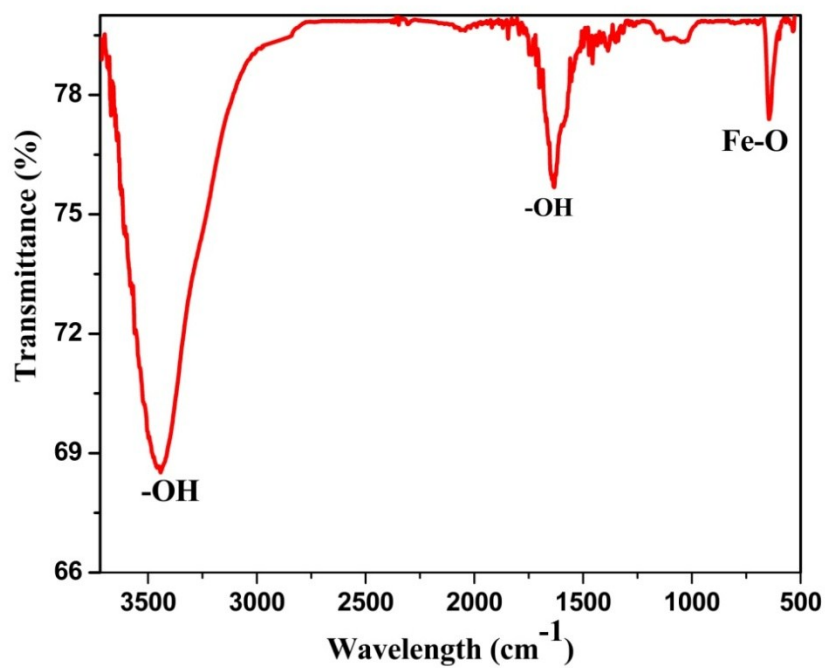

Fig. S2 FTIR spectra of the micro-snowflake structured  $\alpha$ -Fe<sub>2</sub>O<sub>3</sub>.

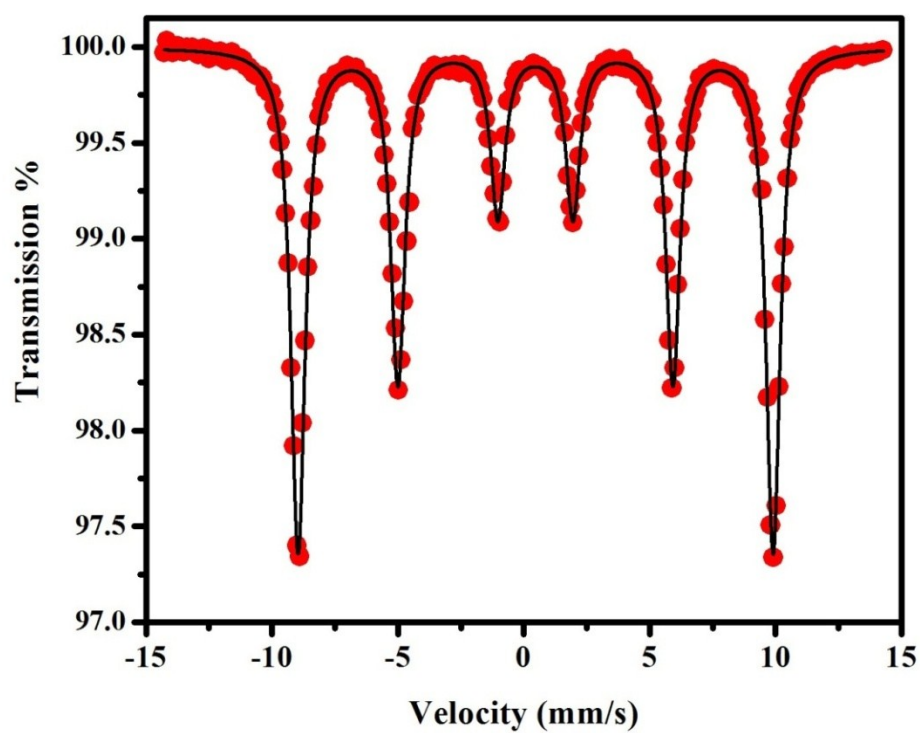

Fig. S3 Mossbauer spectra of the micro-snowflake structured  $\alpha$ -Fe<sub>2</sub>O<sub>3</sub>.

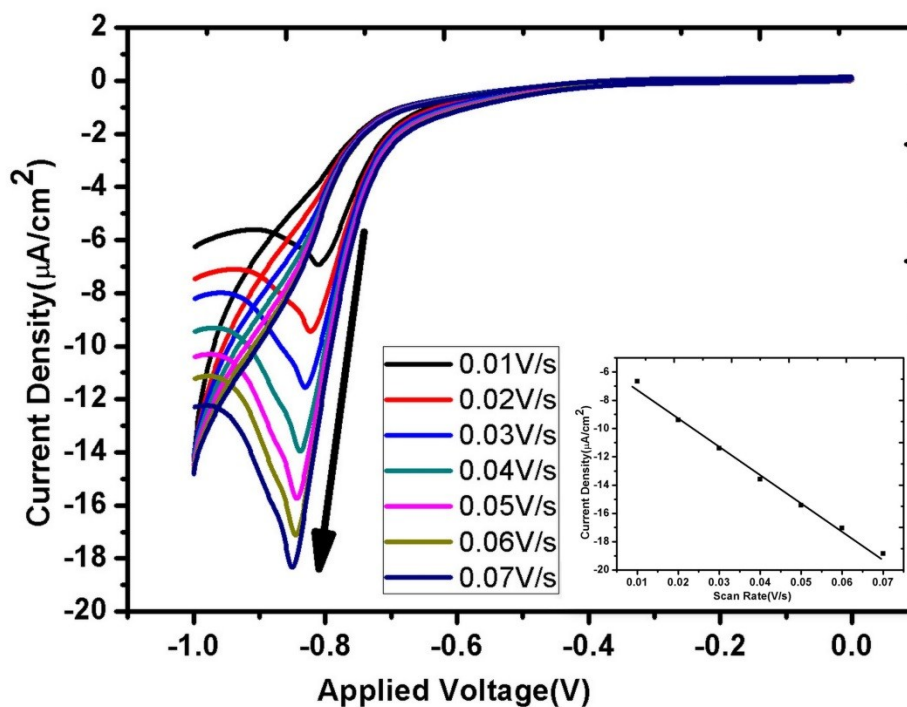

**Fig. S4** Cyclic voltmmetrycurves of the sample at different scan rate, Linear dependence of current density Vs Scan rate (Inset).

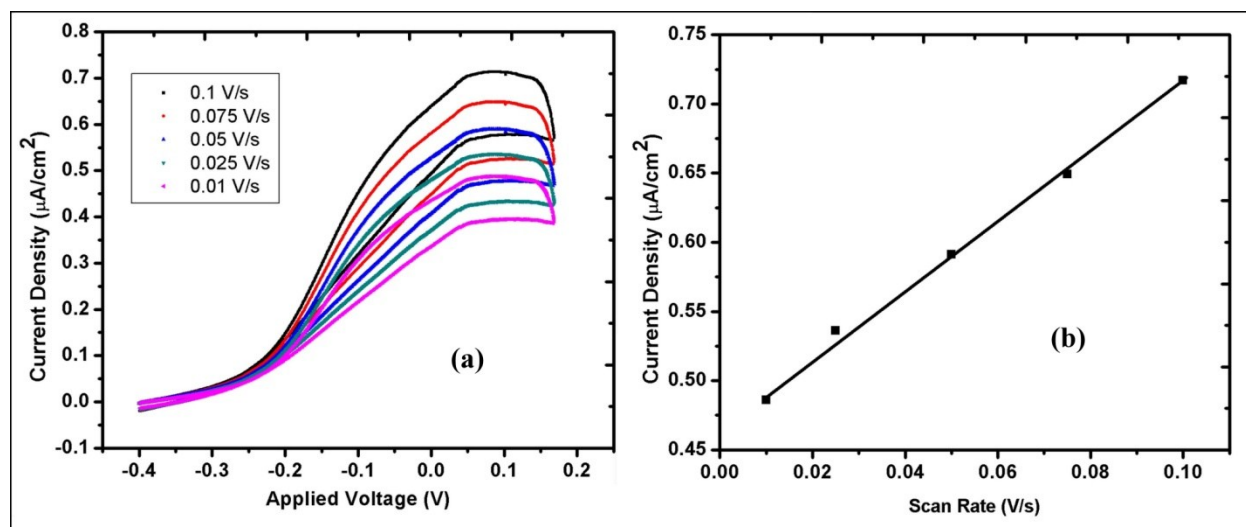

**Fig. S5** Cyclic voltmmetry curves of the sample at different scan rate variation in the presence of 10mM of hydrazine, and Linear dependence of current density vs Scan rate.
